# Supplementary material for: The role of the gold–platinum interface in AuPt/TiO2-catalyzed plasmon-induced reduction of CO2 with water
Source: Royal Society of Chemistry journal article supplement (doi:10.1039/d2fd00094f), 2022-07-08
Supplement: d2fd00094f1.pdf [file d2fd00094f1.pdf]

## Supporting Information

### **The role of the gold-platinum interface in the AuPt/TiO<sub>2</sub>-catalyzed plasmon-induced reduction of CO<sub>2</sub> with water**

Leila Hammoud,<sup>a</sup> Claire Strebler,<sup>a</sup> Joumana Toufaily,<sup>b</sup> Tayssir Hamieh,<sup>b</sup> Valérie Keller<sup>a</sup> and Valérie Caps\*<sup>a</sup>

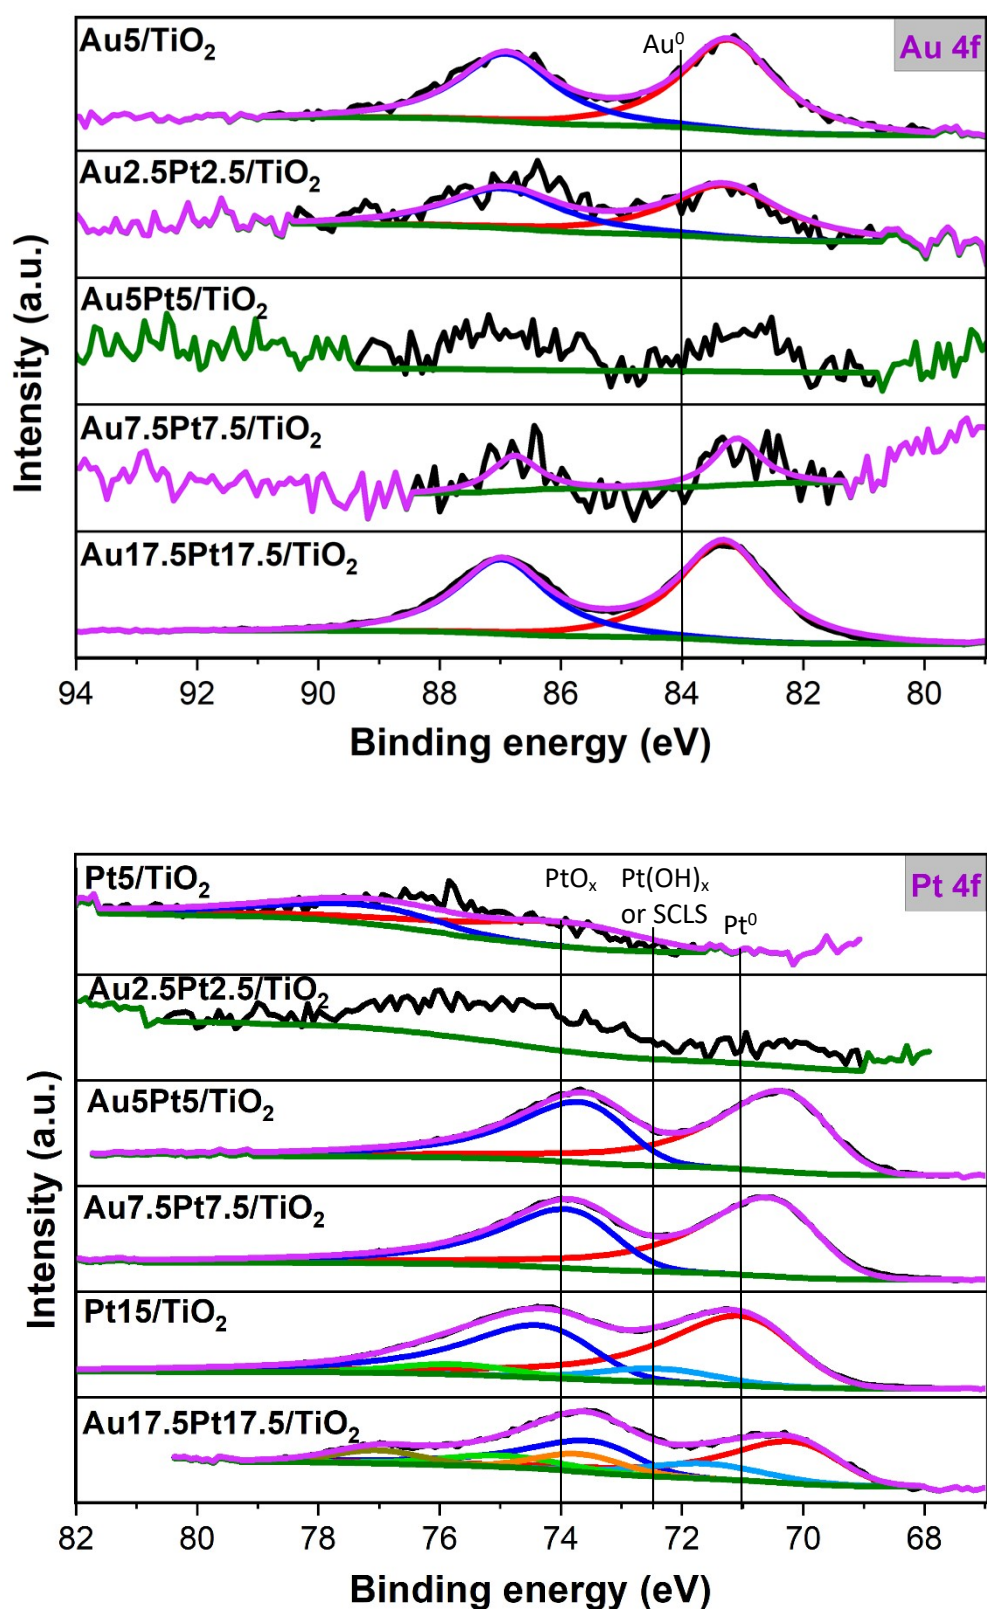

**Figure S1.** Deconvoluted XPS spectra of the Au4f and Pt 4f regions, showing the absence of any oxidized state of Au, the decrease in the Au4f peaks intensity with increasing Pt content for materials prepared by DMF thermal reduction (Pt5/TiO<sub>2</sub>, Au5/TiO<sub>2</sub>, Au2.5Pt2.5/TiO<sub>2</sub>, Au5Pt5/TiO<sub>2</sub>,

Au<sub>7.5</sub>Pt<sub>7.5</sub>/TiO<sub>2</sub>), the absence of oxidized state of Pt for Au<sub>5</sub>Pt<sub>5</sub>/TiO<sub>2</sub> and Au<sub>7.5</sub>Pt<sub>7.5</sub>/TiO<sub>2</sub>, and the presence of such states for materials prepared by NaBH<sub>4</sub> reduction in DMF.

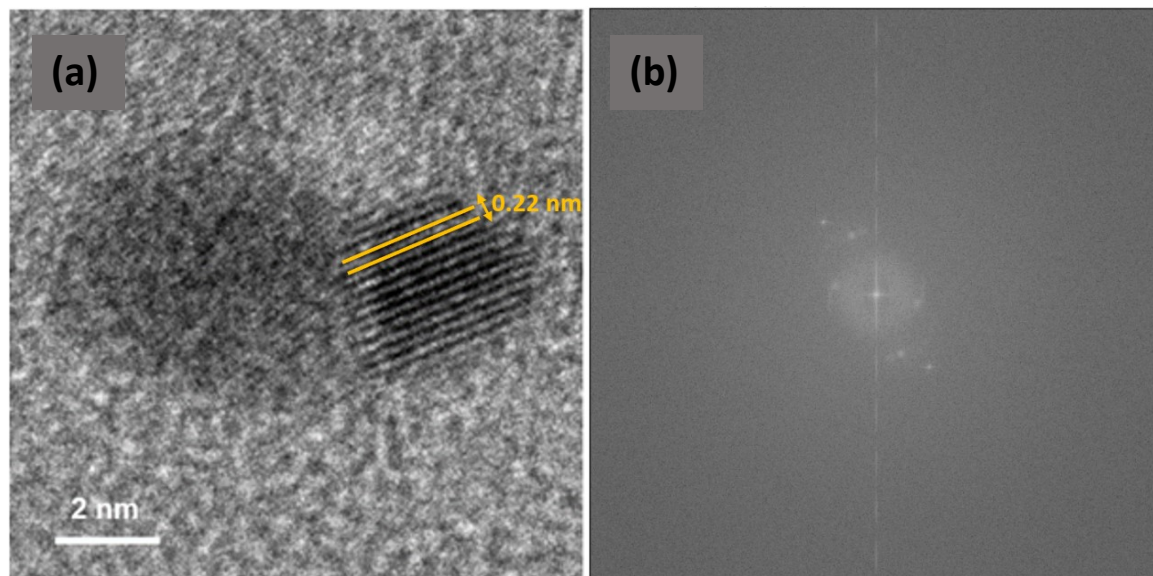

**Figure S2.** HRTEM picture of a Janus particle in Au<sub>17.5</sub>Pt<sub>17.5</sub>/TiO<sub>2</sub> showing interplanar spacing of 0.22 nm for the particle on the right (a) and the corresponding FFT pattern (b). This can be attributed to the (111) interplanar spacing of fcc Pt.<sup>1-3</sup>

## References

- <sup>1</sup> M. Haub, T. Günther, M. Bogner and A. Zimmermann, *Appl. Sci.* 2021, 11, 11793.
- <sup>2</sup> S. A. Abbas, S.-H. Kim, M. I. Iqbal, S. Muhammad, W.-S. Yoon & K.-D. Jung, *Sci. Rep.* 2018, 8, 2986.
- <sup>3</sup> R. V. Maligal-Ganesh, C. Xiao, T. W. Goh, L.-L. Wang, J. Gustafson, Y. Pei, Z. Qi, D. D. Johnson, S. Zhang, F. (Feng) Tao, and W. Huang, *ACS Catal.* 2016, 6, 1754.
